# Supplementary material
Source: Springer Nature journal article supplement (https://www.springermedizin.de/resource/supplementary/12888_2013_1440_MOESM2_ESM.pdf/9480218)
Supplement: MOESM2 [file 9480218]

**Additional File 2. Summary of Unadjusted All-cause, and Schizophrenia-Related Health Care Utilization During 12-Month Postindex Period<sup>a</sup>**

|                                                            | Study Period              |       |             |       |              |       |              |       |              |       |              |       |
|------------------------------------------------------------|---------------------------|-------|-------------|-------|--------------|-------|--------------|-------|--------------|-------|--------------|-------|
|                                                            | 12-Month Postindex Period |       |             |       |              |       |              |       |              |       |              |       |
|                                                            | 0-60 Days                 |       | 61-120 Days |       | 121-180 Days |       | 181-240 Days |       | 241-300 Days |       | 301-364 Days |       |
| Overall Health Care Utilization                            |                           |       |             |       |              |       |              |       |              |       |              |       |
| Had ≥ 1 encounter, n (%)                                   | 2,460                     | 96.81 | 2,301       | 90.55 | 2,296        | 90.36 | 2,288        | 90.04 | 2,289        | 90.08 | 2,314        | 91.07 |
| Had ≥ 1 schizophrenia-related encounter, n (%)             | 2,144                     | 84.38 | 1,869       | 73.55 | 1,856        | 73.04 | 1,805        | 71.04 | 1,799        | 70.80 | 1,823        | 71.74 |
| Number of encounters, mean (SD)                            | 20.12                     | 16.36 | 17.62       | 16.37 | 17.53        | 16.36 | 17.63        | 16.60 | 17.66        | 16.63 | 19.03        | 17.92 |
| Number of psychiatric-related encounters, mean (SD)        | 10.16                     | 10.52 | 8.72        | 10.97 | 8.66         | 10.92 | 8.60         | 11.08 | 8.47         | 10.91 | 9.07         | 11.75 |
| Number of schizophrenia-related encounters, mean (SD)      | 8.17                      | 9.88  | 7.15        | 10.39 | 7.20         | 10.40 | 7.21         | 10.65 | 7.06         | 10.41 | 7.55         | 11.25 |
| Pharmacy Utilization                                       |                           |       |             |       |              |       |              |       |              |       |              |       |
| Had ≥ 1 pharmacy claim, n (%)                              | 2,372                     | 93.35 | 2,116       | 83.27 | 2,069        | 81.42 | 2,083        | 81.98 | 2,058        | 80.99 | 2,098        | 82.57 |
| Had ≥ 1 schizophrenia-related pharmacy claim, n (%)        | 2,271                     | 89.37 | 1,903       | 74.89 | 1,869        | 73.55 | 1,833        | 72.14 | 1,813        | 71.35 | 1,846        | 72.65 |
| Number of pharmacy claims, mean (SD)                       | 9.99                      | 9.15  | 8.01        | 8.00  | 7.94         | 8.16  | 7.97         | 8.13  | 8.03         | 8     | 8.59         | 8.87  |
| Number of schizophrenia-related pharmacy claims, mean (SD) | 3.04                      | 2.74  | 2.27        | 2.41  | 2.22         | 2.34  | 2.18         | 2.34  | 2.16         | 2     | 2.33         | 2.48  |

|                                                          | Study Period              |             |              |              |              |              |       |       |          |        |          |       |  |
|----------------------------------------------------------|---------------------------|-------------|--------------|--------------|--------------|--------------|-------|-------|----------|--------|----------|-------|--|
|                                                          | 12-Month Postindex Period |             |              |              |              |              |       |       |          |        |          |       |  |
|                                                          | 0-60 Days                 | 61-120 Days | 121-180 Days | 181-240 Days | 241-300 Days | 301-364 Days |       |       |          |        |          |       |  |
| ED Utilization                                           |                           |             |              |              |              |              |       |       |          |        |          |       |  |
| Had ≥ 1 ED visit, n (%)                                  | 619                       | 24.36       | 483          | 19.01        | 491          | 19.32        | 464   | 18.26 | 443.00   | 17.43  | 468.00   | 18.42 |  |
| Had ≥ 1 schizophrenia-related ED visit, n (%)            | 152                       | 5.98        | 111          | 4.37         | 107          | 4.21         | 96    | 3.78  | 81.00    | 3.19   | 68.00    | 2.68  |  |
| Number of ED visits, mean (SD)                           | 0.41                      | 0.99        | 0.32         | 0.85         | 0.32         | 0.87         | 0.30  | 0.89  | 0.30     | 1      | 0.31     | 0.93  |  |
| Number of schizophrenia-related ED visits, mean (SD)     | 0.07                      | 0.36        | 0.05         | 0.27         | 0.05         | 0.28         | 0.05  | 0.29  | 0.04     | 0      | 0.03     | 0.24  |  |
| Physician Office Utilization                             |                           |             |              |              |              |              |       |       |          |        |          |       |  |
| Had ≥ 1 office visit, n (%)                              | 1,341                     | 52.77       | 1,290        | 50.77        | 1,280        | 50.37        | 1,295 | 50.96 | 1,300.00 | 51.16  | 1,358.00 | 53.44 |  |
| Had ≥ 1 schizophrenia-related office visit, n (%)        | 476                       | 18.73       | 413          | 16.25        | 414          | 16.29        | 415   | 16.33 | 416.00   | 16.37  | 402.00   | 15.82 |  |
| Number of office visits, mean (SD)                       | 2.01                      | 4.42        | 1.87         | 4.22         | 1.92         | 4.28         | 1.89  | 4.22  | 1.93     | 422.00 | 2.10     | 4.56  |  |
| Number of schizophrenia-related office visits, mean (SD) | 0.93                      | 3.71        | 0.88         | 3.78         | 0.95         | 3.84         | 0.91  | 3.81  | 0.91     | 382.00 | 0.99     | 4.24  |  |

|                                                                        | Study Period              |       |             |       |              |       |              |       |              |        |              |       |
|------------------------------------------------------------------------|---------------------------|-------|-------------|-------|--------------|-------|--------------|-------|--------------|--------|--------------|-------|
|                                                                        | 12-Month Postindex Period |       |             |       |              |       |              |       |              |        |              |       |
|                                                                        | 0-60 Days                 |       | 61-120 Days |       | 121-180 Days |       | 181-240 Days |       | 241-300 Days |        | 301-364 Days |       |
| Hospital Outpatient Utilization                                        |                           |       |             |       |              |       |              |       |              |        |              |       |
| Had ≥ 1 outpatient visit, n (%)                                        | 702                       | 27.63 | 645         | 25.38 | 623          | 24.52 | 597          | 23.49 | 585.00       | 23.02  | 584.00       | 22.98 |
| Had ≥ 1 schizophrenia-related outpatient visit, n (%)                  | 251                       | 9.88  | 189         | 7.44  | 164          | 6.45  | 145          | 5.71  | 132.00       | 5.19   | 130.00       | 5.12  |
| Number of outpatient visits, mean (SD)                                 | 0.59                      | 1.59  | 0.54        | 1.49  | 0.50         | 1.45  | 0.48         | 1.37  | 0.47         | 135.00 | 0.52         | 1.58  |
| Number of schizophrenia-related outpatient visits, mean (SD)           | 0.20                      | 1.02  | 0.14        | 0.80  | 0.13         | 0.74  | 0.11         | 0.68  | 0.10         | 58.00  | 0.10         | 0.64  |
| Inpatient Utilization                                                  |                           |       |             |       |              |       |              |       |              |        |              |       |
| Had ≥ 1 inpatient stay, n (%)                                          | 444                       | 17.47 | 288         | 11.33 | 269          | 10.59 | 245.00       | 9.64  | 243.00       | 9.56   | 242.00       | 9.52  |
| Had ≥ 1 schizophrenia-related inpatient stay, n (%)                    | 352                       | 13.85 | 211         | 8.30% | 201          | 7.91  | 171.00       | 6.73% | 160.00       | 6.30%  | 158.00       | 6.22  |
| Number of unique inpatient admissions, mean (SD)                       | 0.21                      | 0.49  | 0.13        | 0.39  | 0.13         | 0.39  | 0.12         | 0.42  | 0.12         | 0.39   | 0.12         | 0.40  |
| Number of inpatient days, mean (SD)                                    | 1.85                      | 5.66  | 1.40        | 5.37  | 1.38         | 5.72  | 1.27         | 5.52  | 1.24         | 5.52   | 1.25         | 5.39  |
| Number of unique schizophrenia-related inpatient admissions, mean (SD) | 0.16                      | 0.42  | 0.09        | 0.33  | 0.09         | 0.32  | 0.08         | 0.32  | 0.07         | 0.30   | 0.07         | 0.30  |
| Schizophrenia-related number of inpatient days, mean (SD)              | 1.48                      | 5.15  | 1.07        | 4.60  | 1.11         | 5.33  | 1.00         | 5.02  | 0.90         | 4.93   | 0.91         | 4.84  |

|                                                                            | Study Period              |       |             |       |              |       |              |       |              |       |              |       |
|----------------------------------------------------------------------------|---------------------------|-------|-------------|-------|--------------|-------|--------------|-------|--------------|-------|--------------|-------|
|                                                                            | 12-Month Postindex Period |       |             |       |              |       |              |       |              |       |              |       |
|                                                                            | 0-60 Days                 |       | 61-120 Days |       | 121-180 Days |       | 181-240 Days |       | 241-300 Days |       | 301-364 Days |       |
| Other Ancillary Care Utilization                                           |                           |       |             |       |              |       |              |       |              |       |              |       |
| Had ≥ 1 other ancillary care encounter, n (%)                              | 2,016                     | 79.34 | 1,895       | 74.58 | 1,897        | 74.66 | 1,889        | 74.34 | 1,878        | 73.91 | 1,907        | 75.05 |
| Had ≥ 1 schizophrenia-related other ancillary care encounter visit, n (%)  | 1,209                     | 47.58 | 1,098       | 43.21 | 1,122        | 44.16 | 1,104        | 43.45 | 1,099        | 43.25 | 1,102        | 43.37 |
| Number of other ancillary care encounters, mean (SD)                       | 6.92                      | 9.79  | 6.75        | 10.46 | 6.73         | 10.29 | 6.87         | 10.63 | 6.82         | 11    | 7.39         | 11.24 |
| Number of schizophrenia-related other ancillary care encounters, mean (SD) | 3.76                      | 7.99  | 3.71        | 8.46  | 3.76         | 8.54  | 3.88         | 8.85  | 3.77         | 9     | 4.03         | 9.18  |

ED = emergency department; SD = standard deviation.

<sup>a</sup> The 12-month period following the index discharge date defines the postindex period.
